# Supplementary material for: Removal of Phosphate from Wastewater with a Recyclable La-Based Particulate Adsorbent in a Small-Scale Reactor
Source: MDPI journal article supplement (doi:10.3390/w14152326), 2022-07-27
Supplement: s1 [file s1]

Archive with 1 entries (1 files):
- water-1805318-supplementary.pdf
