# Supplementary material for: Removal of Phosphate from Wastewater with a Recyclable La-Based Particulate Adsorbent in a Small-Scale Reactor
Source: MDPI journal article supplement (doi:10.3390/w14152326), 2022-07-27
Supplement: s1 [file s1 › water-1805318-supplementary.pdf]

### **Supplementary**

Fig. S1. Effect of different ratios of materials on phosphorus removal efficiency

Fig. S2. Effect of La concentration on phosphate adsorption by the La-CZ

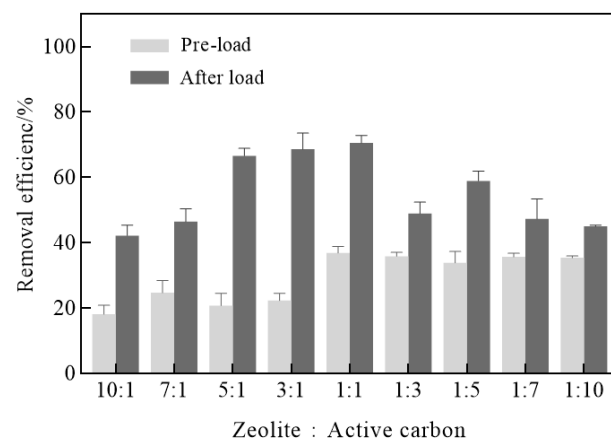

Fig. S1. Effect of different ratios of materials on phosphorus removal efficiency

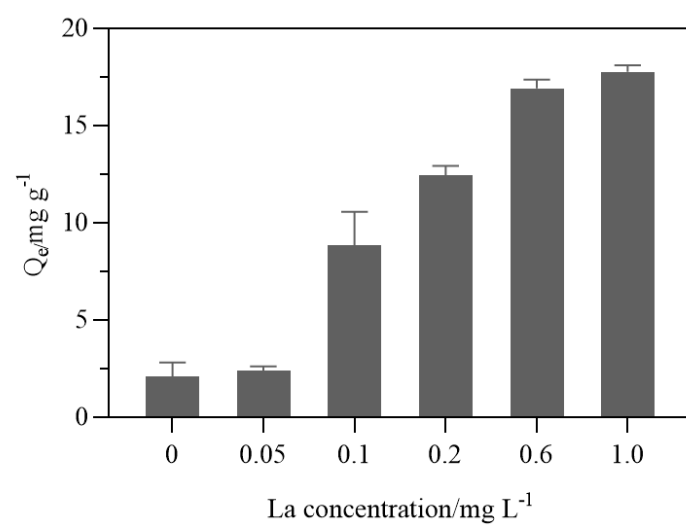

Fig. S2. Effect of La concentration on phosphate adsorption by the La-CZ
